# Supplementary material for: Metal-decorated γ-graphyne as a drug transporting agent for the mercaptopurine chemotherapy drug: a DFT study
Source: Royal Society of Chemistry journal article supplement (doi:10.1039/d2cp05379a), 2023-01-01
Supplement: d2cp05379a1.pdf [file d2cp05379a1.pdf]

## Supplementary material

# Metal Decorated $\gamma$ -Graphyne as Drug transporting agent For Mercaptopurine chemotherapy drug: A DFT study

*Sreejith P. C.<sup>a</sup>, Seetha Lakshmy<sup>a</sup>, Gopal Sanyal<sup>b</sup>, Nandakumar Kalarikkal<sup>a, c, d\*</sup>, and  
Brahmananda Chakraborty<sup>e, f, \*</sup>*

<sup>a</sup> *International and Inter University Centre for Nanoscience and Nanotechnology, Mahatma Gandhi University, Kottayam 686560, India*

<sup>b</sup> *Mechanical Metallurgy Division, Bhabha Atomic Research Centre, Trombay, Mumbai 400085*

<sup>c</sup> *School of Pure and Applied Physics, Mahatma Gandhi University, Kottayam, India*

<sup>d</sup> *School of Nanoscience and Nanotechnology, Mahatma Gandhi University, Kottayam 686560, Kerala, India*

<sup>e</sup> *High Pressure & Synchrotron Radiation Physics Division, Bhabha Atomic Research Centre, Trombay, Mumbai 400085, India*

<sup>f</sup> *Homi Bhabha National Institute, Mumbai 400094, India*

\*Corresponding authors: [nkkalarikkal@mgu.ac.in](mailto:nkkalarikkal@mgu.ac.in), [brahma@barc.gov.in](mailto:brahma@barc.gov.in)

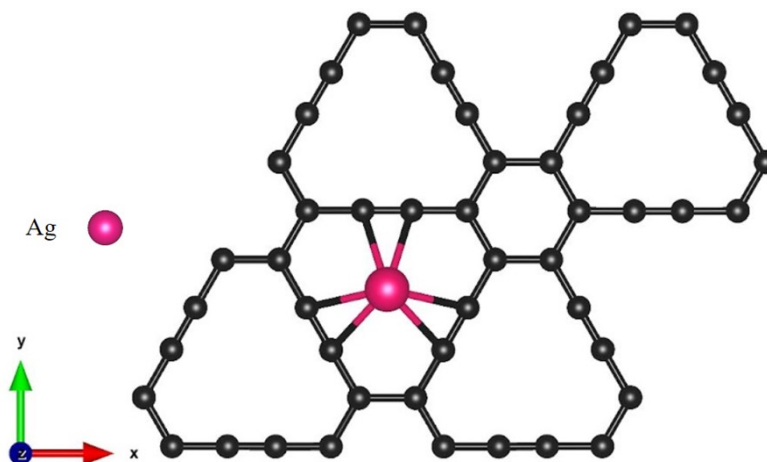

Figure S. 1. Geometrically optimized structure of Ag-decorated GYN.

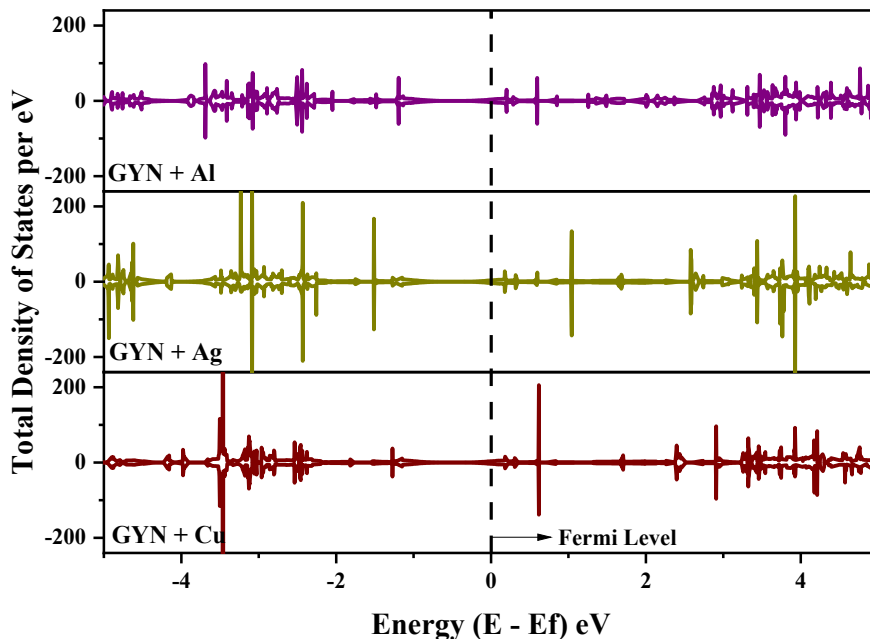

Figure S. 2. TDOS plots of GYN + Al, GYN + Ag, and GYN + Cu systems.

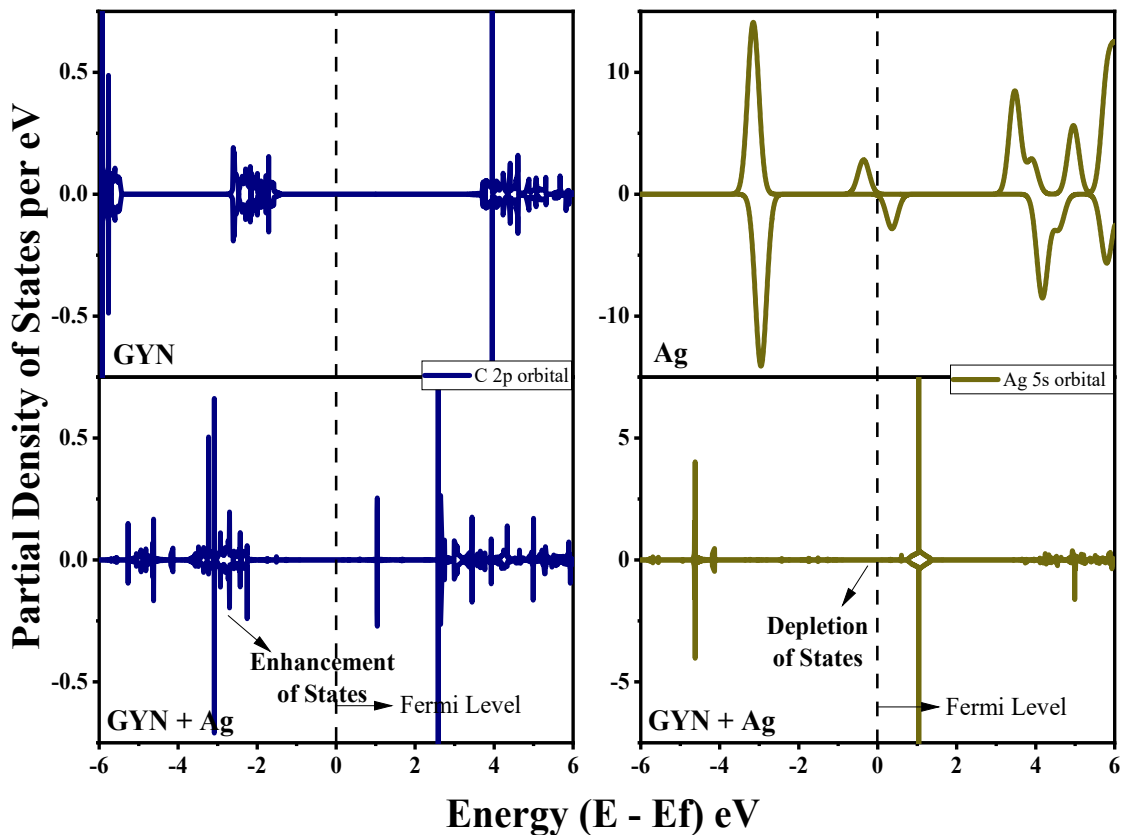

Figure S. 3. Compares the PDOS of  $2p$  orbital of the C atom in pristine and Ag-decorated GYN (left segment). Meanwhile, the valence  $5s$  orbital of the Ag is compared with that of the single metal atom in its isolated state in the right segment.

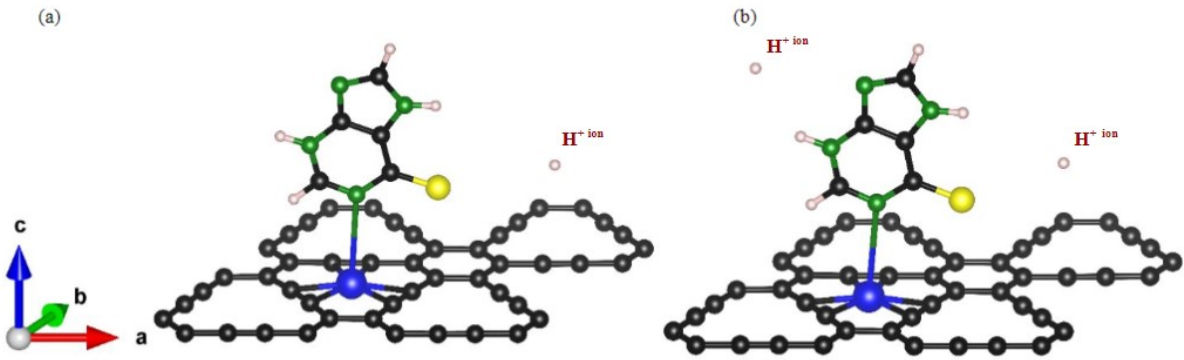

Figure S. 4. The AIMDs images of (a) Al and (b) Cu decorated GYN system at 400K

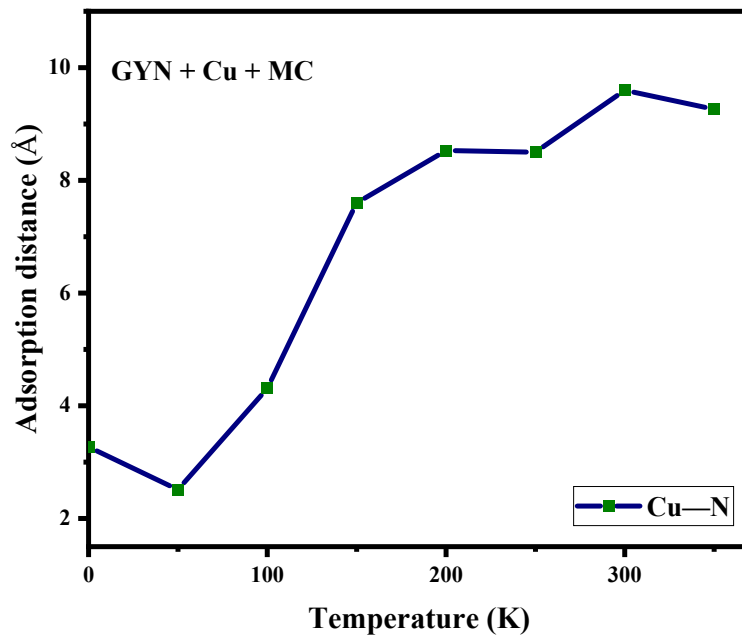

Figure S. 5. Adsorption distance versus temperature plot of MC adsorbed Cu decorated GYN system in the acidic pH environment.
